# Supplementary material for: Wound Healing Properties and Antimicrobial Effects of Parkia clappertoniana Keay Fruit Husk Extract in a Rat Excisional Wound Model
Source: PubMed Central journal article supplement (PMC9338854; doi:10.1155/2022/9709365), 2022-07-23
Supplement: 9709365.f1.pdf [file 9709365.f1.pdf]

**Positive control (NaOH)**

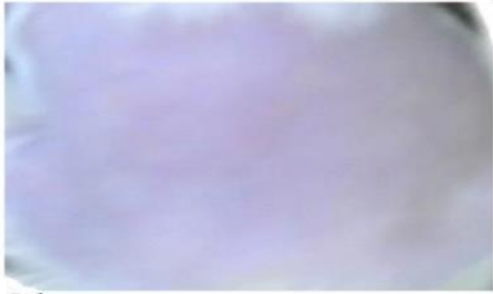

**0 hour**

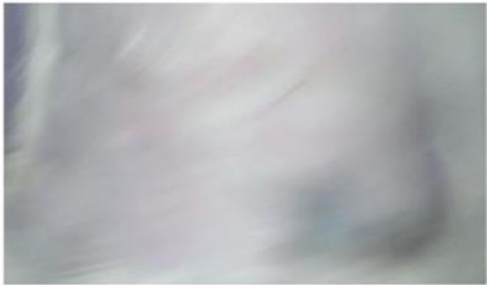

**6 hours**

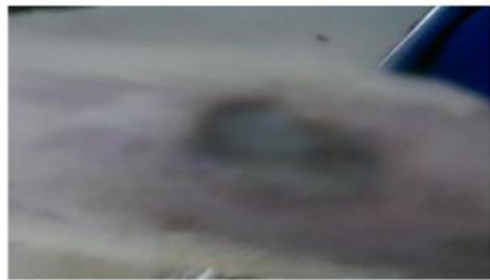

**24 hours**

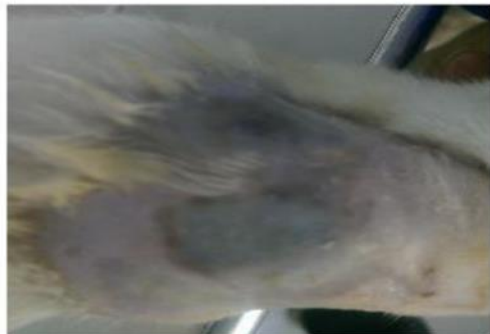

**48 hours**

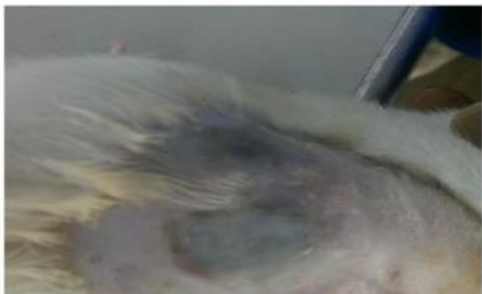

**PCFHE**

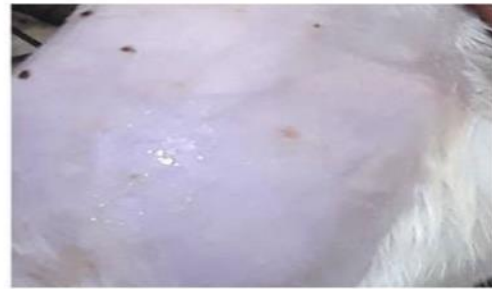

**0 hour**

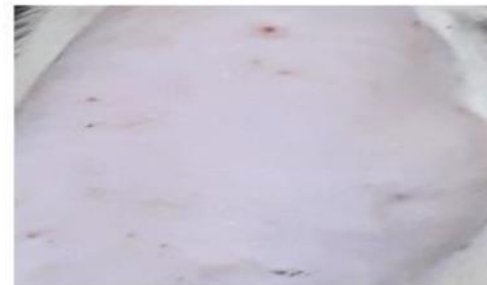

**6 hours**

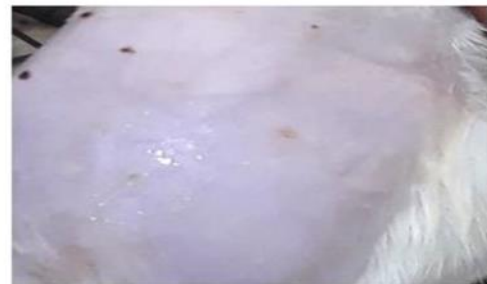

**24 hours**

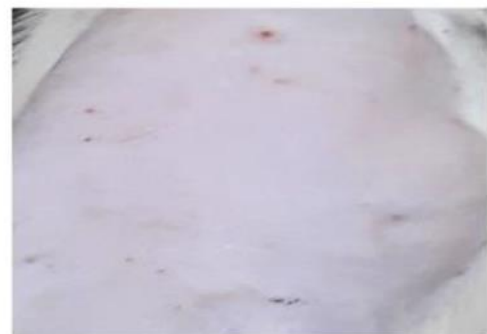

**48 hours**

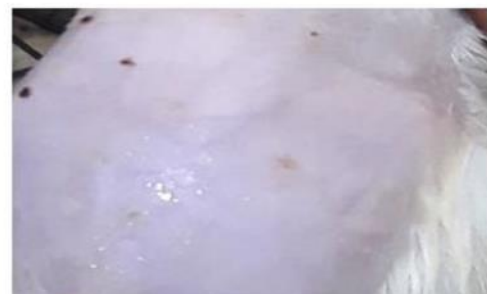

S1. Degree of skin allergic reactions after topical exposure of shaved dorsal skin area of rats to PCFHE-WHF and NaOH. After topical application skin areas were monitored every 24 hours for 3 days. PCFHE-WHF – *Parkia clappertoniana* fruit husk extract reconstituted wound healing formula; NaOH – Sodium hydroxide.
